# Supplementary material for: Chigno/CG11180 and SUMO are Chinmo-interacting proteins with a role in Drosophila testes somatic support cells
Source: PeerJ journal article supplement (doi:10.7717/peerj.16971), 2024-03-14
Supplement: Fig2B.xlsx [file Fig2B.xlsx]

## Sheet: 8.25 ONPG
	sample	time incubated until stopped (min)	V (mL)	OD600 of harvested cells	OD420 at end	1000xOD420	(txVxOD600)	β-galactosidase units	Average
SUMO AD +			0.1x conc. Factor= 0.1x5=0.5
	B1	24	0.5	0.7	0.08	80	8.4	9.52381	15.0794
Slx5 BD	B2	24	0.5	0.7	0.17	170	8.4	20.2381
	B3	24	0.5	0.7	0.13	130	8.4	15.4762
	C1	24	0.5	1.4	0.11	110	16.8	6.54762	5.75397
Ch. STOP BD	C2	24	0.5	1.4	0.06	60	16.8	3.57143
	C3	24	0.5	1.4	0.12	120	16.8	7.14286
	A1	1140	0.5	1.2	0.35	350	684	0.511696	0.506823
BD only	A2	1140	0.5	1.2	0.37	370	684	0.540936
	A3	1140	0.5	1.2	0.32	320	684	0.467836
	D1	1140	0.5	1.7	0.74	740	969	0.763674	0.509116
Ch. Native BD	D2	1140	0.5	1.7	0.3	300	969	0.309598
	D3	1140	0.5	1.7	0.44	440	969	0.454076
	E1	1140	0.5	0.5	0.11	110	285	0.385965	0.444444
Ch. Non-stop BD	E2	1140	0.5	0.5	0.12	120	285	0.421053
	E3	1140	0.5	0.5	0.15	150	285	0.526316

## Sheet: Sheet2
	sample	β-galactosidase units	Average		Standard Deviation
SUMO AD +
		9.52381	15.0794		4.38308
Slx5 BD	Slx5 BD	20.2381
		15.4762
		6.54762	5.75397		1.5623
Ch. STOP BD	Ch. STOP BD	3.57143
		7.14286
		0.511696	0.506823		0.030041
BD only	BD only	0.540936
		0.467836
		0.763674	0.509116		0.189417
Ch. Native BD	Ch. Native BD	0.309598
		0.454076
		0.385965	0.444444		0.0596377
Ch. Non-stop BD	Ch. Non-stop BD	0.421053
		0.526316

## Sheet: 9.12 ONPG
	sample	time incubated until stopped (min)	V (mL)	OD600 of harvested cells	OD420 at end	1000xOD420	(txVxOD600)	β-galactosidase units	Average	SD			slx5	stop	Native	nonstop	BD		anova
SUMO AD +			0.1x conc. Factor= 0.1x5=0.5																a	b	c	d	e
	B1	38	0.5	1.2	0.13	130	22.8	5.70175	5.40936	0.506448	5.702		5.409	1.748	1.43	0.166	0.077		slx5	stop	Native	nonstop	BD
Slx5 BD	B2	38	0.5	1.2	0.13	130	22.8	5.70175			5.702
	B3	38	0.5	1.2	0.11	110	22.8	4.82456			4.825								5.702	2.247	1.328	0.142	0.077
								#DIV/0!											5.702	1.311	1.226	0.213	0.077
	C1	178	0.5	0.6	0.12	120	53.4	2.24719	1.74782	0.471276	2.247		1.748						4.825	1.685	1.736	0.142	0
Ch. STOP BD	C2	178	0.5	0.6	0.07	70	53.4	1.31086			1.311
	C3	178	0.5	0.6	0.09	90	53.4	1.68539			1.685
								#DIV/0!													tukey-kramer analusis site: http://astatsa.com/OneWay_Anova_with_TukeyHSD/_result/
	A1	1298	0.5	0.2	0.01	10	129.8	0.0770416	0.0770416	0.04448	1.328		1.43
BD only	A2	1298	0.5	0.2	0.01	10	129.8	0.0770416			1.226
	A3	1298	0.5	0.2		0	129.8	0			1.736
								#DIV/0!
	D1	178	0.5	1.1	0.13	130	97.9	1.32789	1.43003	0.27025	0.142		0.166
Ch. Native BD	D2	178	0.5	1.1	0.12	120	97.9	1.22574			0.213
	D3	178	0.5	1.1	0.17	170	97.9	1.73647			0.142
								#DIV/0!
	E1	1298	0.5	1.3	0.12	120	843.7	0.142231	0.165936	0.0410585	0.077		0.077
Ch. Non-stop BD	E2	1298	0.5	1.3	0.18	180	843.7	0.213346			0.077
	E3	1298	0.5	1.3	0.12	120	843.7	0.142231

## Sheet: ANOVA results
Anova: Single Factor
SUMMARY
Groups	Count	Sum	Average	Variance
Column 1	3	16.229	5.40967	0.256376
Column 2	3	5.243	1.74767	0.221969
Column 3	3	4.29	1.43	0.072828
Column 4	3	0.497	0.165667	0.00168033
Column 5	3	0.154	0.0513333	0.00197633
ANOVA
Source of Variation	SS	df	MS	F	P-value	F crit
Between Groups	56.6717	4	14.1679	127.678	1.54226e-08	3.47805
Within Groups	1.10966	10	0.110966
Total	57.7813	14
