# Supplementary material for: Chigno/CG11180 and SUMO are Chinmo-interacting proteins with a role in Drosophila testes somatic support cells
Source: PeerJ journal article supplement (doi:10.7717/peerj.16971), 2024-03-14
Supplement: Figure4G.xlsx [file Figure4G.xlsx]

## Sheet: Sheet1
Genotype	normal	mild	moderate	severe	severe aberrant	total
c587-Gal4/+ (7-16 d)	56	0	0	0	0	56
UAS-CG11180 RNAi/+ (11-14 d)	11	0	0	0	0	11
(6-10 d)	54	3	7	19	4	77
(10-14 d)	38	2	5	15	7	67
(14-18 d)	12	1	1	15	5	34
