# Supplementary material for: Chigno/CG11180 and SUMO are Chinmo-interacting proteins with a role in Drosophila testes somatic support cells
Source: PeerJ journal article supplement (doi:10.7717/peerj.16971), 2024-03-14
Supplement: Figure5B.xlsx [file Figure5B.xlsx]

## Sheet: Sheet1
Genotype	normal (non phenotypic)	mild	severe	severe aberrant (unformed)	Total Testes
EyaA3-Gal4/+ (25°C), 7-10 d	36	0	0	0	36
EyaA3-Gal4/UAS-Smt3 RNAi (25°C), 6-10 d	1	1	11	0	13
EyaA3-Gal4/UAS-Smt3 RNAi (18-25°C), 1-3 d	8	0	0	0	8
EyaA3-Gal4/UAS-Smt3 RNAi (18-25°C), 7-10 d	1	1	2	0	4
