# Supplementary material for: Chigno/CG11180 and SUMO are Chinmo-interacting proteins with a role in Drosophila testes somatic support cells
Source: PeerJ journal article supplement (doi:10.7717/peerj.16971), 2024-03-14
Supplement: TableS1.xls [file TableS1.xls]

## Sheet: Sheet 1 - Supplemental Table 1
Supplemental Table 1
			Degree of Phenotype (% of Testes)
Genotype	Age & Temperature	% Phenotypic Testes	Mild	Moderate	Severe	Severe Aberrant
c587-Gal4 / +	7-16 d (25°C)	0% (n=56)	0	0	0	0
UAS-CG11180-RNAi / +	7-14 d (25°C)	0% (n=22)	0	0	0	0
c587-Gal4 / + ; UAS-CG11180-RNAi / +	6-10 d (18 - 25°C)	42.9% (n=77)	0.039	0.091	0.247	0.052
c587-Gal4 / + ; UAS-CG11180-RNAi / +	10-14 d (18 - 25°C)	43.3% (n=67)	0.03	0.075	0.224	0.104
c587-Gal4 / + ; UAS-CG11180-RNAi / +	14-18 d (18 - 25°C)	64.7% (n=34)	0.029	0.029	0.441	0.147
EyaA3-Gal4 / +	7-10 d (25°C)	0% (n=36)	0	0	0	0
EyaA3-Gal4 / + ; UAS-Smt3-RNAi / +	6-10 d (25°C)	96% (n=28)	0.034	0	0.931	0
EyaA3-Gal4 / + ; UAS-Smt3-RNAi / +	1-3 d (18 - 25°C)	0% (n=16)	0	0	0	0
EyaA3-Gal4 / + ; UAS-Smt3-RNAi / +	7-10 d (18 - 25°C)	91.7% (n=12)	0.167	0	0.833	0
